# Supplementary figures and images for: Study of near-infrared light-induced excitation of upconversion nanoparticles as a vector for non-viral DNA delivery
Source: Royal Society of Chemistry journal article supplement (doi:10.1039/d0ra05385f), 2020-01-01

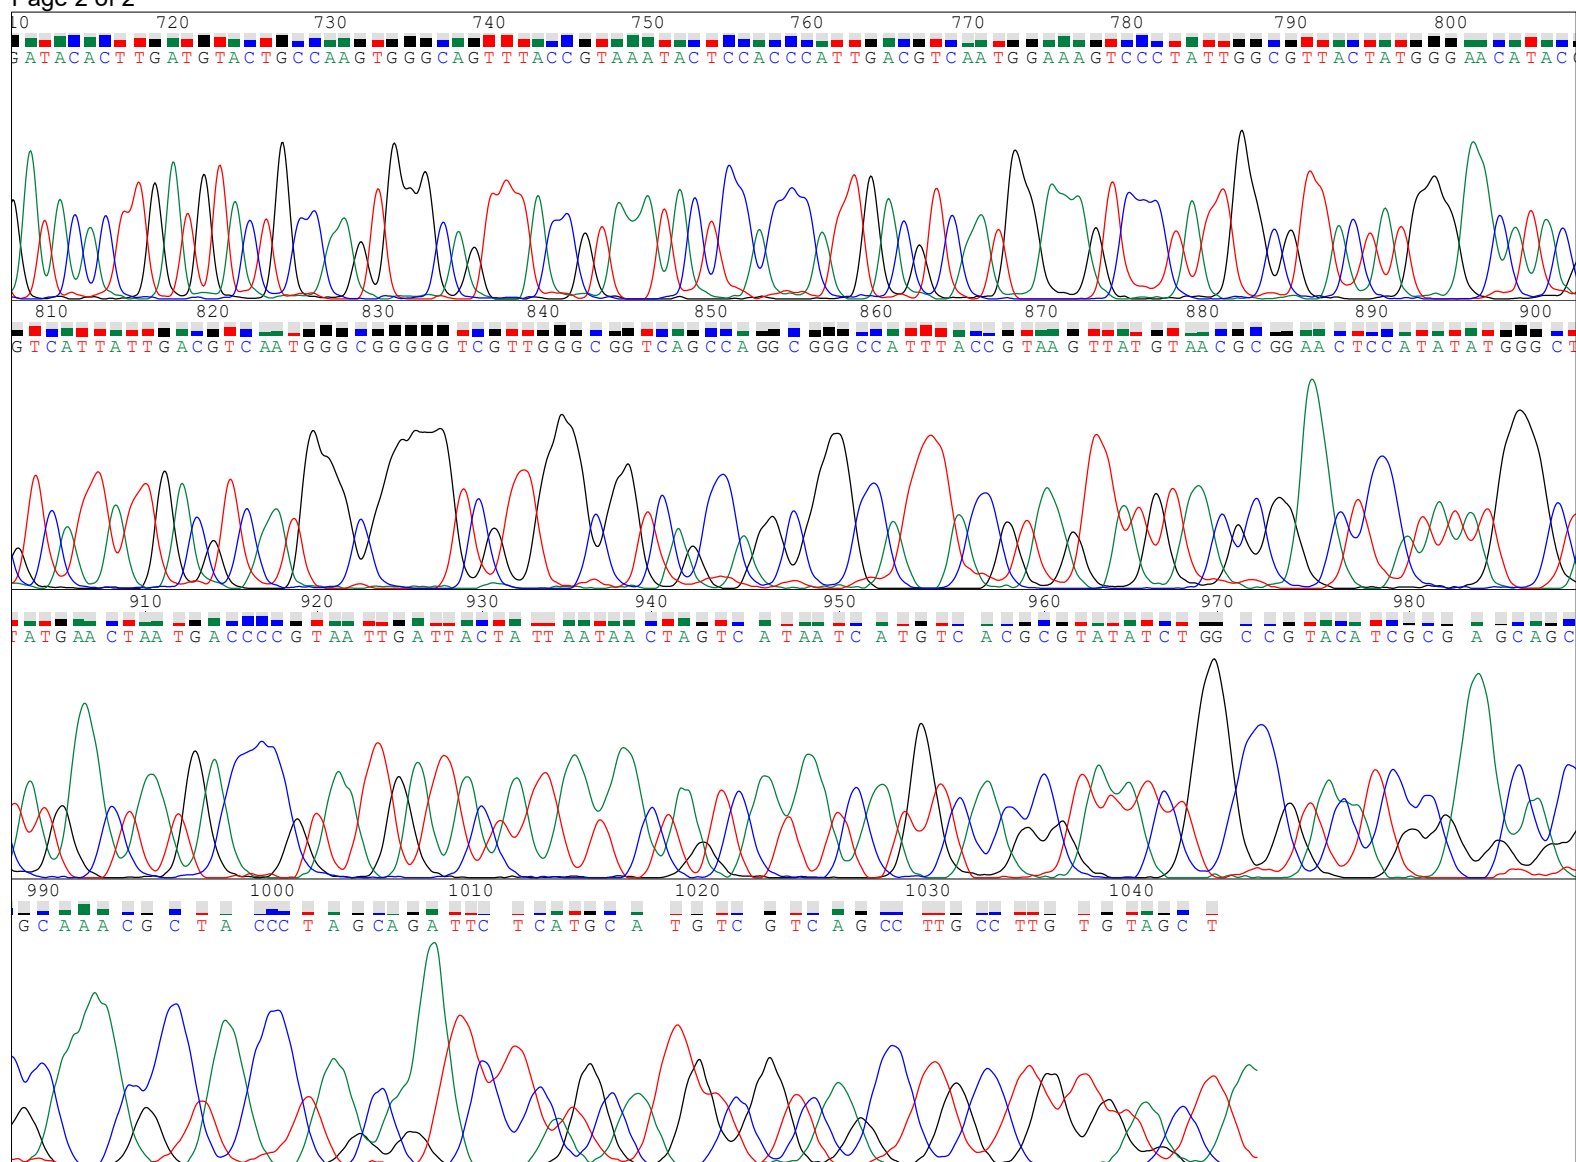





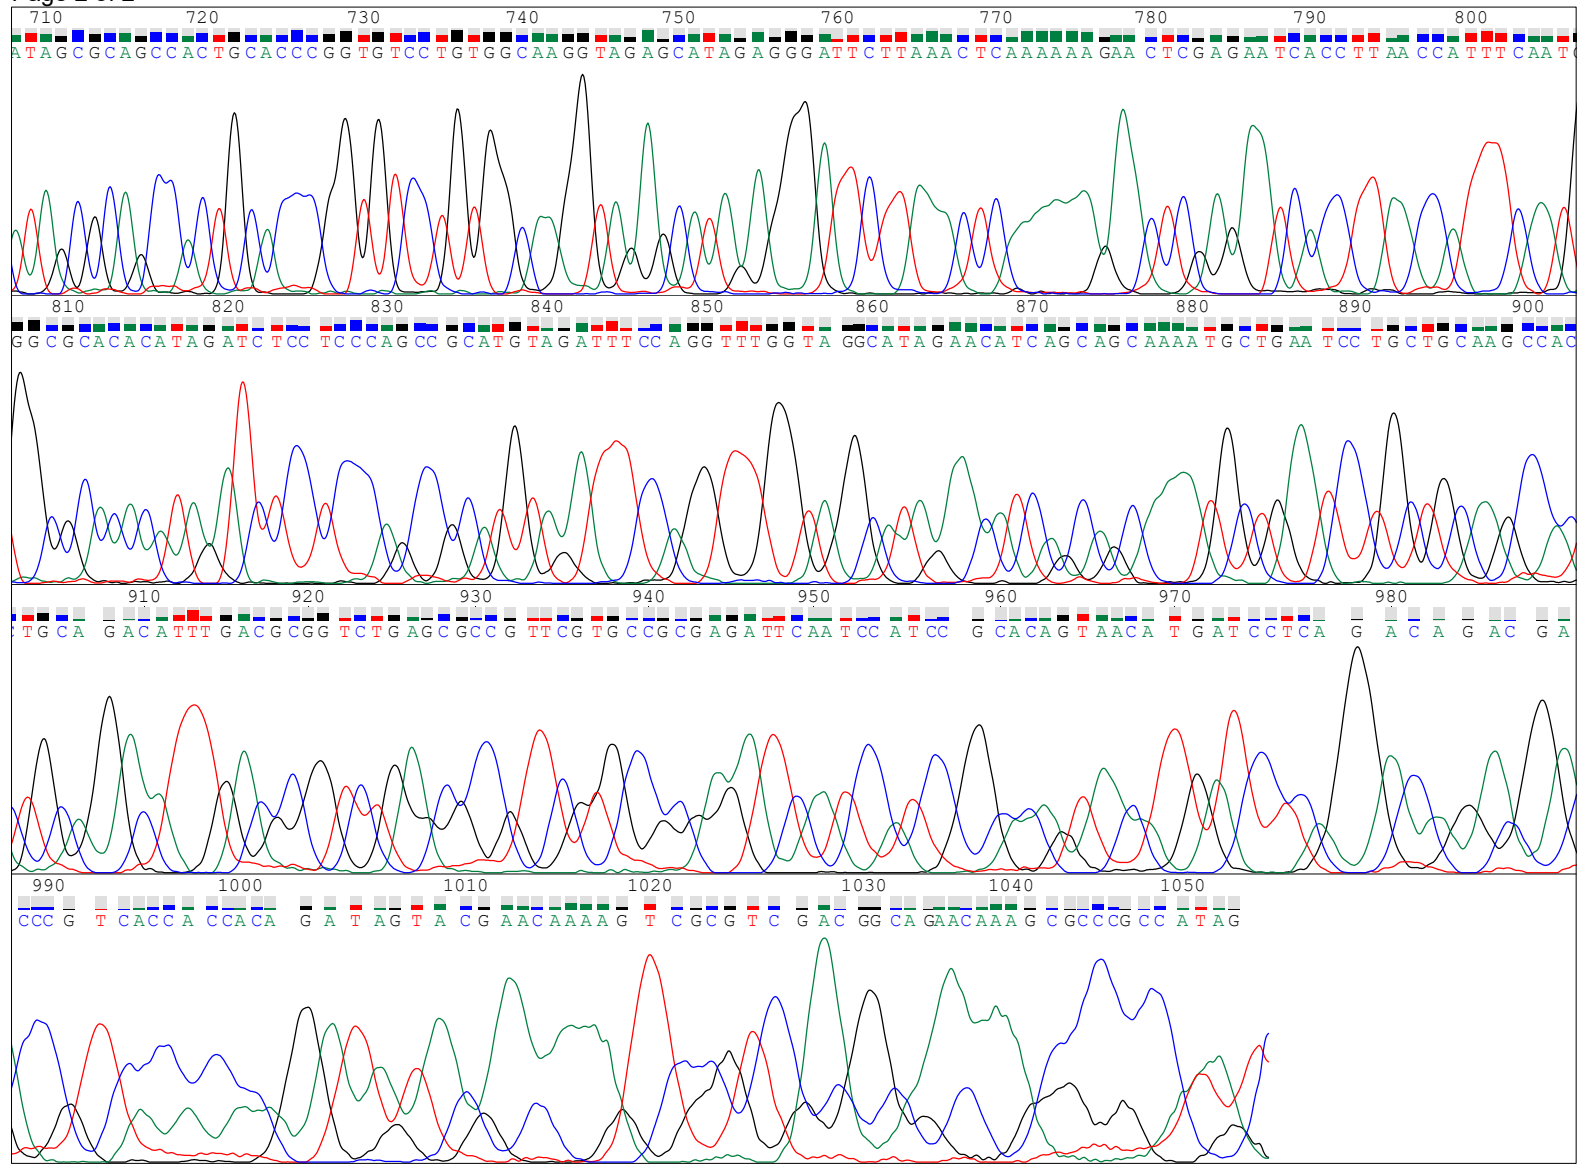

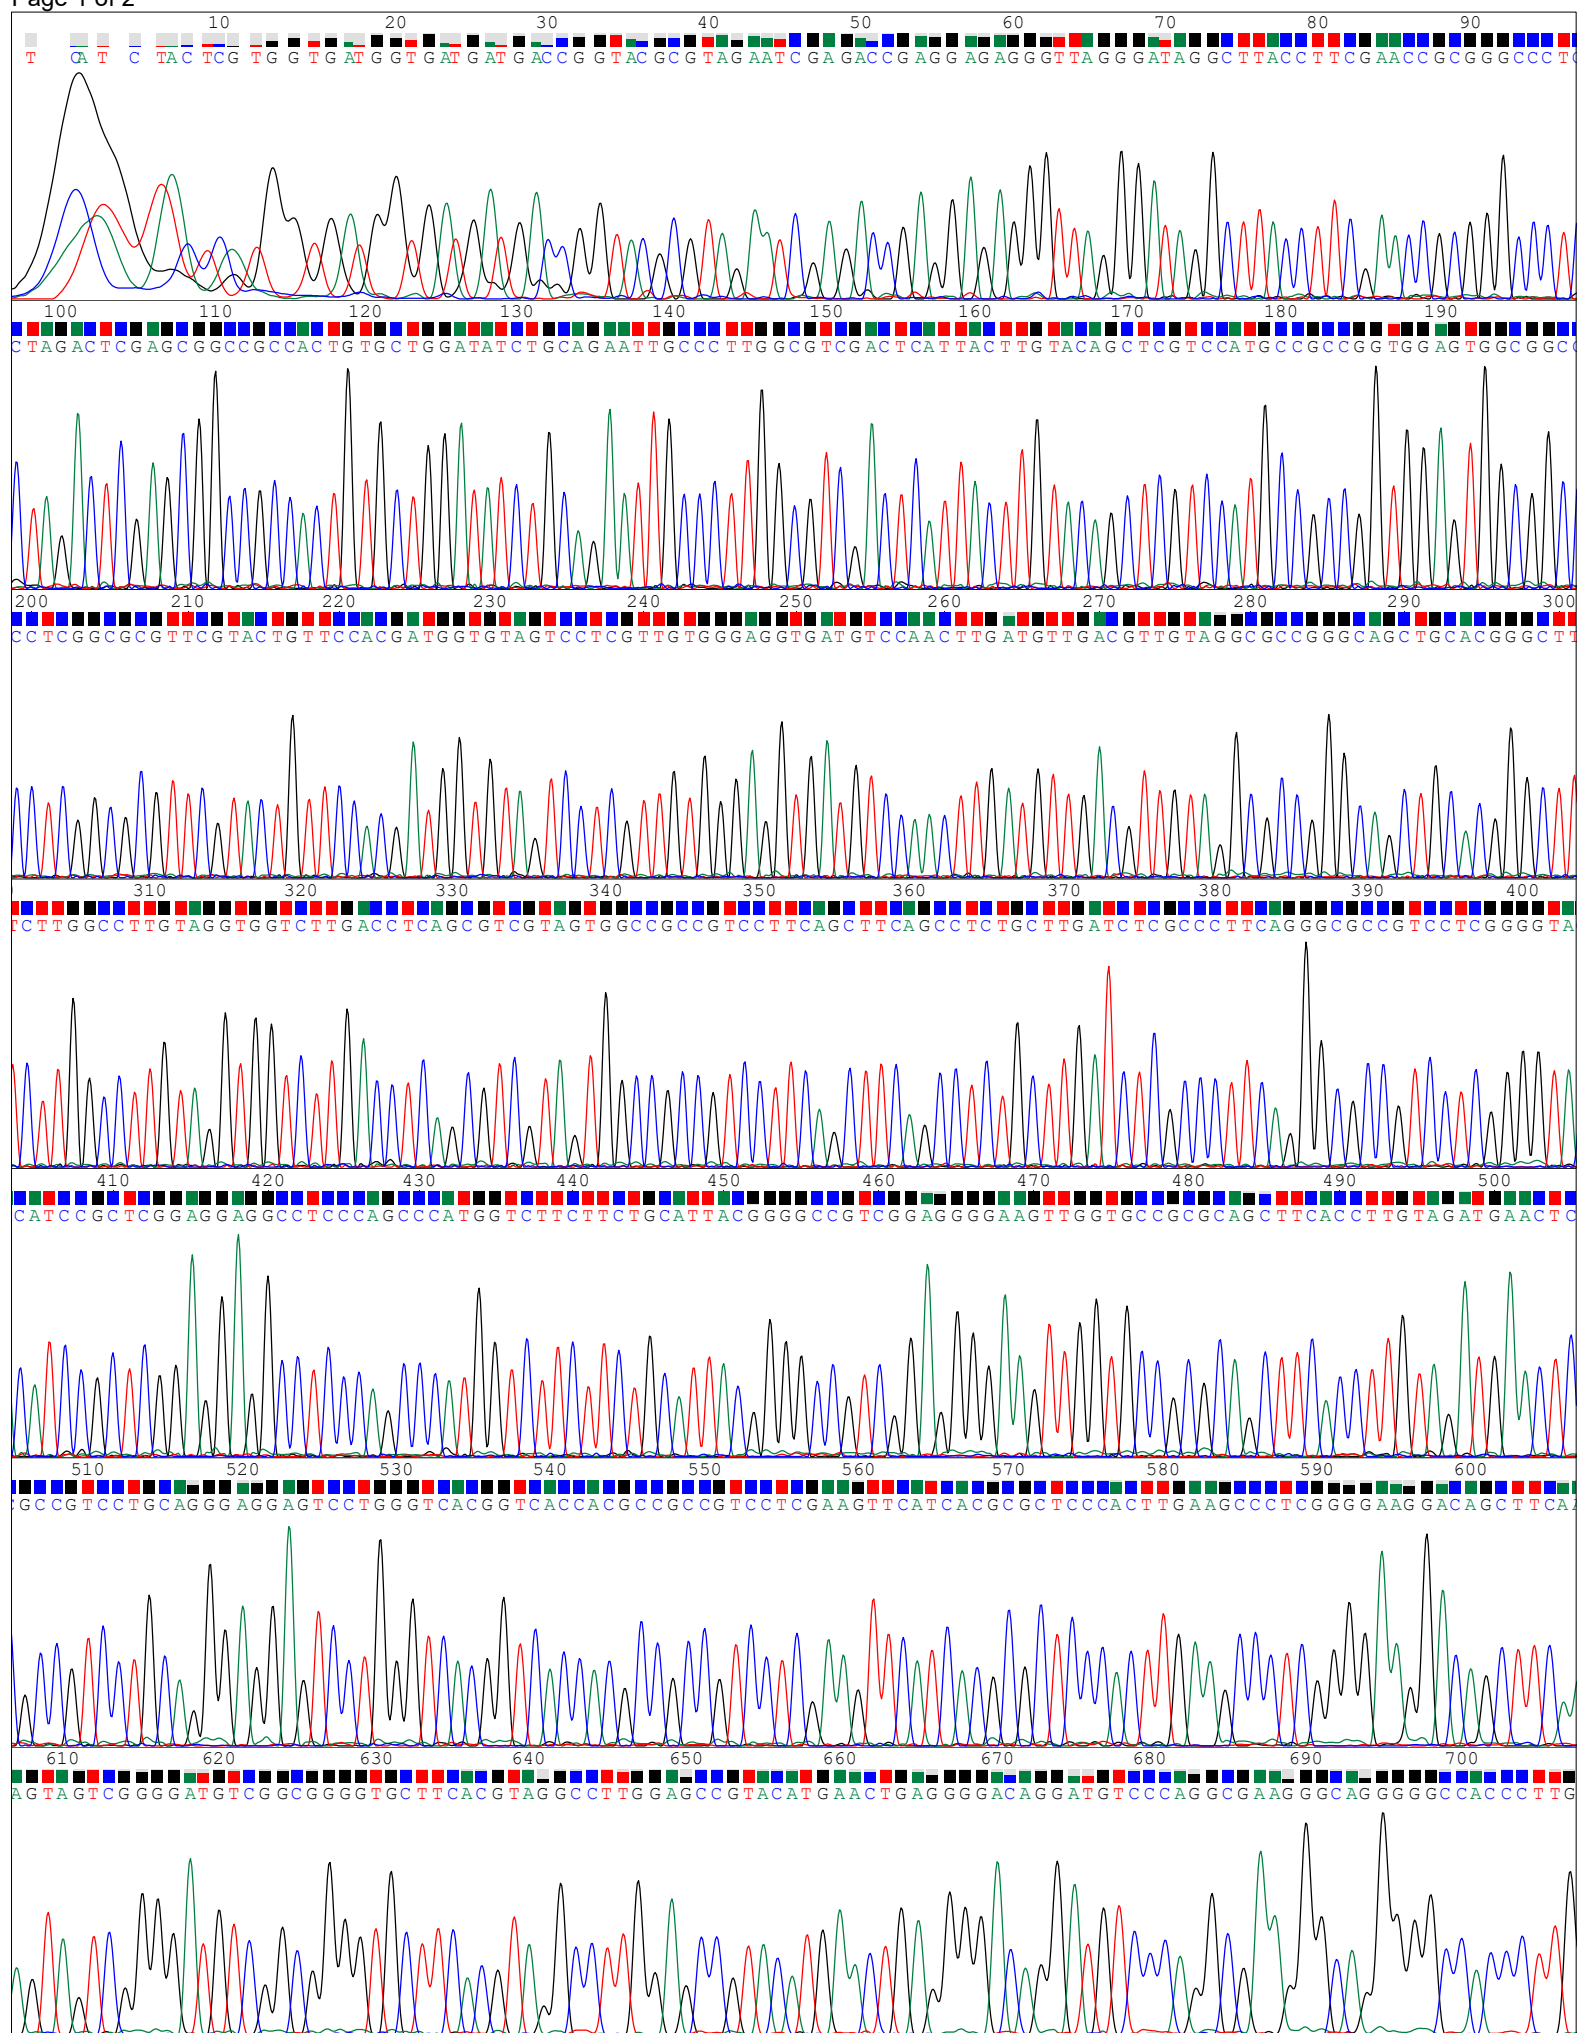

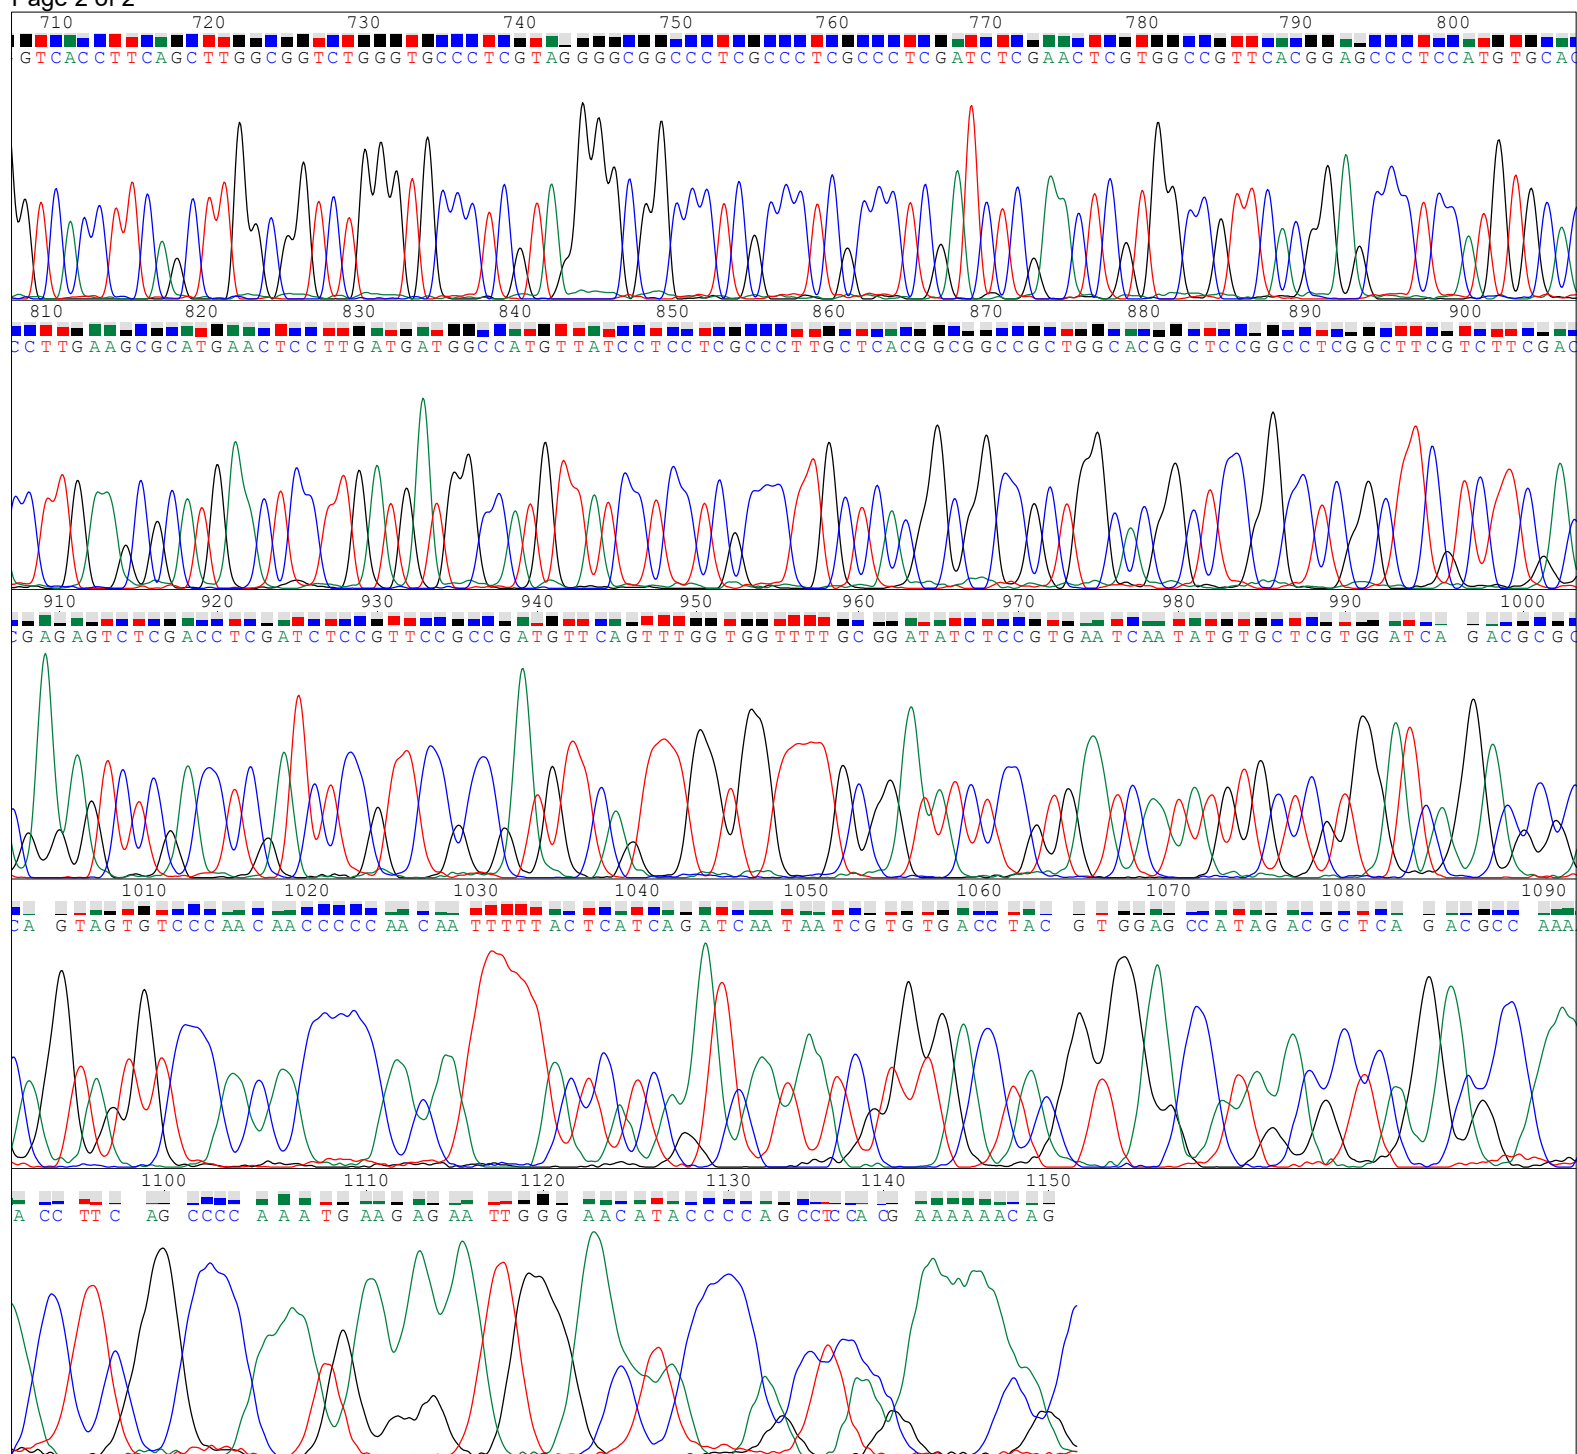

Supplement: d0ra05385f1.pdf [file d0ra05385f1.pdf]
